# Supplementary material for: Near infrared spectroscopy for body fat sensing in neonates: quantitative analysis by GAMOS simulations
Source: PubMed Central journal article supplement (PMC5234151; doi:10.1186/s12938-016-0310-y), 2017-01-11
Supplement: 12938_2016_310_MOESM1_ESM.pdf [file 12938_2016_310_MOESM1_ESM.pdf]

- File name: Additional file 1
- File format: .pdf
- Title of data: Table S1. Comparison of body composition methods using FOM equation and the measurements concept of each method.
- Description of data: Comparison of body composition methods using FOM equation and the measurements concept of each method. The variables in the FOM equation include estimated cost (including equipment set-up), estimated measurement time, requirement for skilled operators, noninvasiveness, mobility, and safety. The FOM should be the highest for the best device, which is NIR method (bolded).

| Methods                                     | Primary Measurements                                                  | Estimated Cost<br>(including<br>equipment set-up) | Estimated<br>Measurement<br>Time | Requirement for<br>Skilled Operator    | Non-invasive | Portable   | Safety                                                                                                             | Figure of Merit, FOM<br>(FOM= skilled operator +<br>noninvasive + portable + safe –<br>cost - measurement time) |
|---------------------------------------------|-----------------------------------------------------------------------|---------------------------------------------------|----------------------------------|----------------------------------------|--------------|------------|--------------------------------------------------------------------------------------------------------------------|-----------------------------------------------------------------------------------------------------------------|
| Skinfold thickness<br>(SFT)                 | Regional adipose tissue<br>(subcutaneous fat)                         | Low                                               | 20 s                             | High. Due to high<br>variability       | Yes          | Yes        | High safety. Does not use<br>ionising radiation.                                                                   | 5                                                                                                               |
| <b>Near infrared<br/>interactance (NIR)</b> | <b>Regional adipose tissue<br/>(subcutaneous fat)</b>                 | <b>Low</b>                                        | <b>10 minutes</b>                | <b>Low</b>                             | <b>Yes</b>   | <b>Yes</b> | <b>High safety. Does not use<br/>ionising radiation.</b>                                                           | <b>6</b>                                                                                                        |
| Ultrasound                                  | Regional adipose tissue<br>(subcutaneous fat) and<br>lean muscle mass | High                                              | 20 minutes                       | High. For<br>handling the<br>equipment | Yes          | No         | High safety. Does not use<br>ionising radiation.                                                                   | 1                                                                                                               |
| Computer<br>Tomography (CT)                 | Total body volume,<br>specific regional muscle<br>and bone density    | High                                              | 20 minutes                       | High. For<br>handling the<br>equipment | Yes          | No         | Not encouraged for<br>newborns. Ionising radiation.<br>Effective dose from 5.4μSv<br>for the total body scan [54]. | 0                                                                                                               |
| Dual-energy X-ray<br>absorptiometry         | Total body water (TBW),<br>lean mass and regional                     | High                                              | 20 minutes                       | High. For<br>handling the              | Yes          | No         | Not encouraged for<br>newborns. Effective dose                                                                     | 0                                                                                                               |

|                                        |                                                                               |      |            |                                                 |     |     |                                                                                                               |   |
|----------------------------------------|-------------------------------------------------------------------------------|------|------------|-------------------------------------------------|-----|-----|---------------------------------------------------------------------------------------------------------------|---|
| (DEXA)                                 | body fat, bone mineral content.                                               |      |            | equipment                                       |     |     | from 1.1mSv for the whole body [55].                                                                          |   |
| Stable Isotope Dilution (SID)          | TBW and extracellular fluid                                                   | High | 20 minutes | High. For accurate dose sampling and processing | No  | Yes | High safety. Does not use ionising radiation.                                                                 | 1 |
| Air-displacement plethysmography (ADP) | Total body volume and total body fat                                          | High | 10 minutes | Medium. For handling the equipment              | Yes | No  | High safety. Does not use ionising radiation.                                                                 | 3 |
| Magnetic resonance imaging (MRI)       | Total and regional adipose tissue (subcutaneous, visceral and inter-muscular) | High | 20 minutes | High. For handling the equipment                | Yes | No  | Not encouraged for newborns. The effect of high magnetic fields are unknown. Does not use ionising radiation. | 0 |

The variables in the FOM equation include estimated cost (including equipment set-up), estimated measurement time, requirement for skilled operators, noninvasiveness, mobility, and safety. The FOM should be the highest for the best device, which is the NIR method. Cost is low=1, high = 2; measurement time is low = 1 if <1 minutes, medium = 2 if 2 minutes to 10 minutes, high =3 if >20 minutes; skilled required is low=3, medium = 2, high = 1; non-invasive is Yes=2, No= 1; portable is Yes=2, No= 1; safe is = 1 if radiation, high safety = 2.
